# Supplementary material for: A Phytophthora infestans RXLR effector targets plant PP1c isoforms that promote late blight disease
Source: PubMed Central journal article supplement (PMC4740116; doi:10.1038/ncomms10311), 2016-01-29
Supplement: ncomms10311-s1.pdf [file ncomms10311-s1.pdf]

## Supplementary Data

### Supplementary Figures

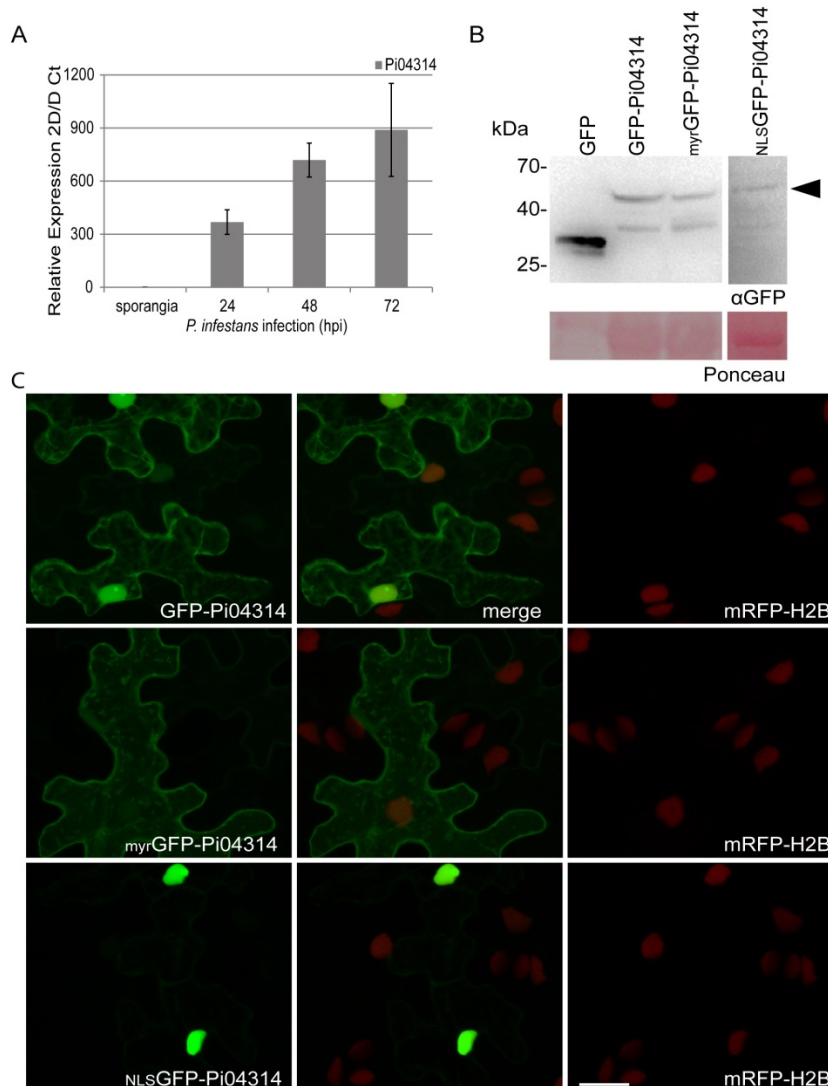

**Supplementary Figure 1. Pi04314 is expressed during infection, each GFP-Pi04314 fusion is stable and  $_{\text{myr}}$ GFP-Pi04314 is removed from the nucleus while  $_{\text{NLS}}$ GFP-Pi04314 is concentrated in the nucleus.**

(A) Graph of qRT-PCR results indicating that the effector Pi04314 is specifically upregulated during early infection stages between 24 and 72 hours after inoculation compared to sporangia.

(B) Western blotting indicates that the GFP-Pi04314 fusion and the two modified forms of the fusion, with myristoylation ( $_{\text{myr}}$ ) or nuclear localisation (NLS) signals, are all similarly stable. Arrowhead indicates the full-size fusion proteins. Protein loading is indicated by ponceau stain and the antibody used is  $\alpha$ GFP.

(C) Images are projections of confocal Z series of the three fusions expressed in a transgenic *N. benthamiana* line expressing an mRFP tagged histone (mRFP-H2B) to mark the nucleus. GFP-Pi04314 is localised to the nucleus with cytoplasmic background,  $_{\text{myr}}$ GFP-Pi04314 is excluded from the nucleus and  $_{\text{NLS}}$ GFP-Pi04314 is focused in the nucleus. Scale bar is 20  $\mu\text{m}$ .

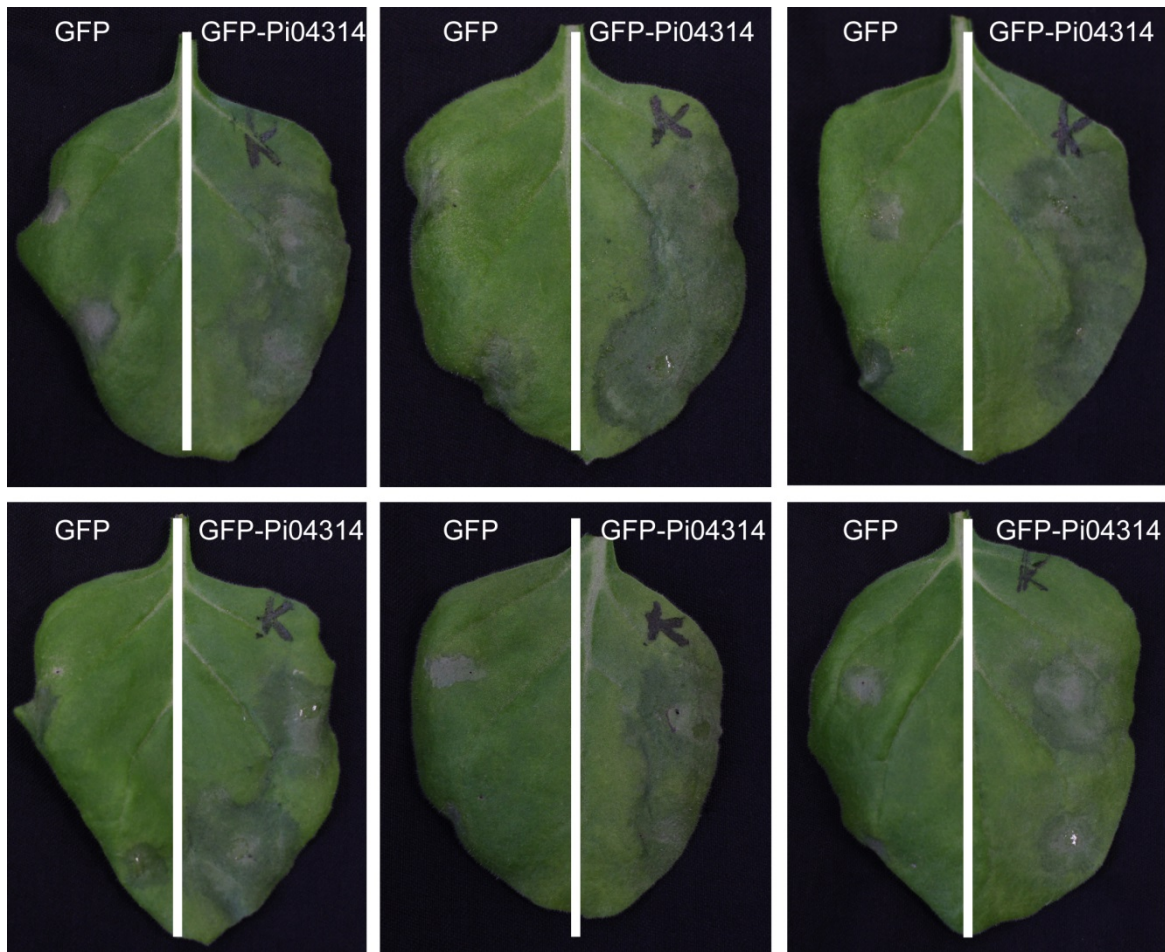

**Supplementary Figure 2. GFP-Pi04314 promotes *P. infestans* infection.** Example leaves showing the increased growth of *P. infestans* on the side of each leaf infiltrated with the GFP-Pi04314 compared to the side infiltrated with the GFP control.

A

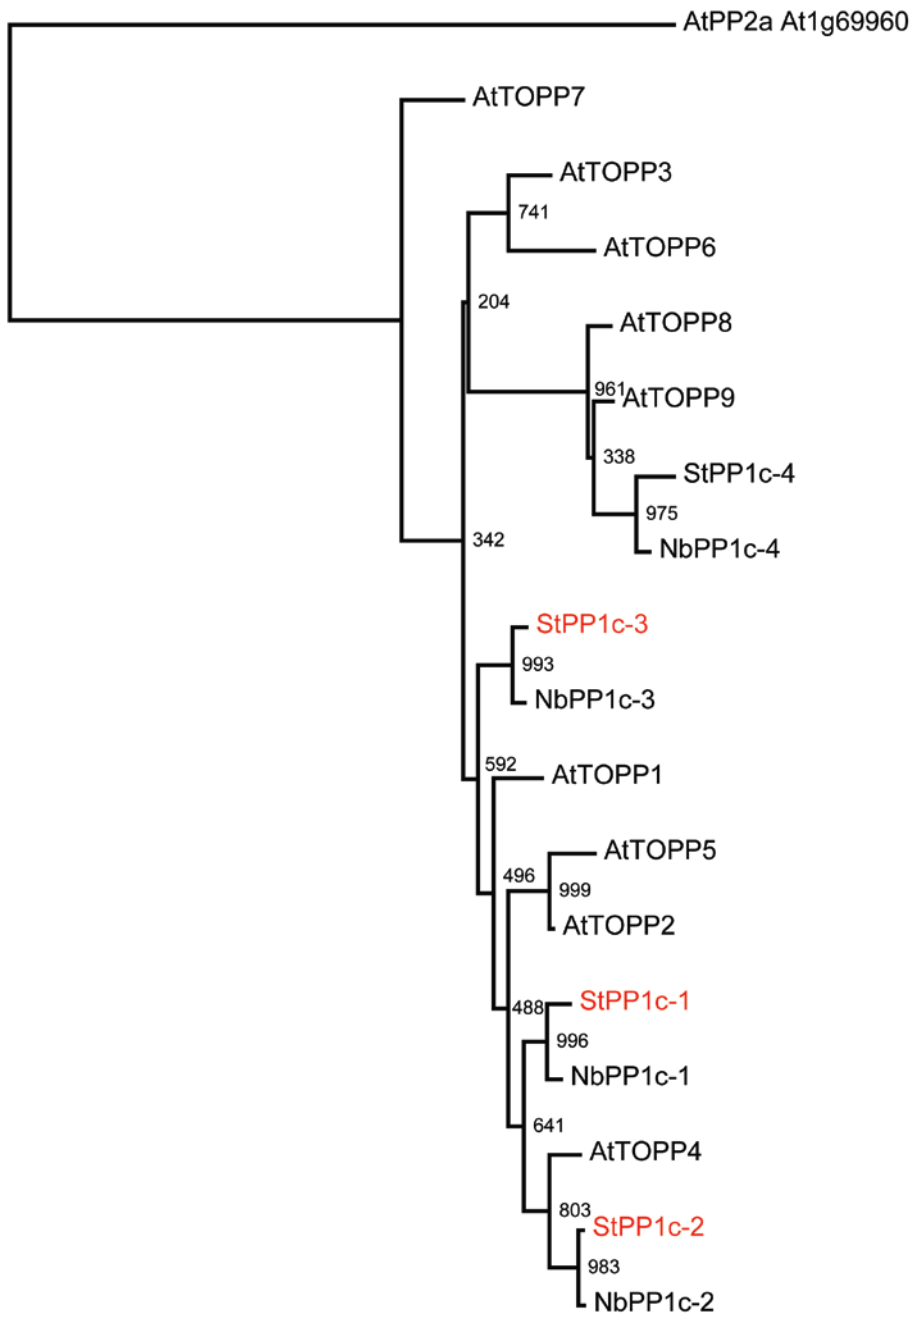

0.1

B

```
10 20 30 40 50 60 70 80
NbPP1c-1 RQVQLSSEAIETRSVCTASKEIFLQPNLLELEAPIKICGDIHGQYGDLLRLFEYGGFPPEANYLFLGDYVDRGKQSLLETIC
NbPP1c-2 KLVLQSLSEAIKQLCVASRDIFLKQPNLLELEAPIKICGDIHGQYSDLLRLFEYGGFPPEANYLFLGDYVDRGKQSLLETIC
NbPP1c-3 KQVQLTLEAIKQLCLISKEIFLQPNLLELEAPIKICGDIHGQYSDLLRLFEYGGFPPEANYLFLGDYVDRGKQSLLETIC
AtTOPP2 KQAMLNSEIRQLCVASREIFLQPNLLELEAPIKICGDIHGQYSDLLRLFEYGGFPPEANYLFLGDYVDRGKQSLLETIC
AtTOPP5 KQAMLNDSIEIRQLCFVSRIFLQPNLLELEAPIKICGDIHGQYSDLLRLFEYGGFPPEANYLFLGDYVDRGKQSLLETIC
AtTOPP4 KQVQLSEAIKQLCTTARDIFLQPNLLELEAPIKICGDIHGQYSDLLRLFEYGGFPPEANYLFLGDYVDRGKQSLLETIC
AtTOPP6 KQACITETIEIRQLCLASKEVFLQPNLLELEAPIKICGDIHGQYSDLLRLFEYGGFPPEANYLFLGDYVDRGKQSLLETIC
AtTOPP7 KLVQLSEIEIRQLCFVSRDIFLQPNLLELEAPIKICGDIHGQYSDLLRLFEYGGFPPEANYLFLGDYVDRGKQSLLETIC
AtTOPP8 KQVQLSSEIEIRQLCFNARQIFLQPNLLELEAPIKICGDIHGQYSDLLRLFEYGGFPPEANYLFLGDYVDRGKQSLLETIC
AtTOPP9 KQVQLSEIEIRQLCVNARQIFLQPNLLELEAPIKICGDIHGQYSDLLRLFEYGGFPPEANYLFLGDYVDRGKQSLLETIC
AtTOPP1 KQVHLSEIEIRQLCAVSKIEIFLQPNLLELEAPIKICGDIHGQYSDLLRLFEYGGFPPEANYLFLGDYVDRGKQSLLETIC
AtTOPP3 KQVQLTAEIKHLCSTAKQIFLQPNLLELEAPIKICGDIHGQYSDLLRLFEYGGFPPEANYLFLGDYVDRGKQSLLETIC
StPP1c-1 RQVQLSSEAIETRSVCTASKEIFLQPNLLELEAPIKICGDIHGQYGDLLRLFEYGGFPPEANYLFLGDYVDRGKQSLLETIC
StPP1c-2 KLVLQSLSEAIKQLCVASRDIFLQPNLLELEAPIKICGDIHGQYSDLLRLFEYGGFPPEANYLFLGDYVDRGKQSLLETIC
StPP1c-3 KQVQLTLEAIKQLCLVAKETFLQPNLLELEAPIKICGDIHGQYSDLLRLFEYGGFPPEANYLFLGDYVDRGKQSLLETIC
NbPP1c-4 KQVQLSSEIEIRQLCVNARQIFLQPNLLELEAPIKICGDIHGQYSDLLRLFEYGGFPPEANYLFLGDYVDRGKQSLLETIC
StPP1c-4 KQVQLSSEAIETRSVCTASKEIFLQPNLLELEAPIKICGDIHGQYGDLLRLFEYGGFPPEANYLFLGDYVDRGKQSLLETIC
AtPP2a At1g69960 - - - - L S E T E V K M L C E H A K T I L V E E Y N V Q P V K C P V T V C G D I H G Q F Y D L T E L F R T G G S S P D T N Y L F M G D Y V D R G Y Y S V E T V S
```

```
90 100 110 120 130 140 150 160
NbPP1c-1 LLLAYKIKYPENFLLRGNHECASINRIYGFYDECKRRFNVRLWKTFTDCFNCLPVAALIDDKILCMHGGLSPDLTDL
NbPP1c-2 LLLAYKIKYPENFLLRGNHECASINRIYGFYDECKRRFNVKLWKSFTDCFNCLPVAALIDDKILCMHGGLSPDLSSLD
NbPP1c-3 LLLAYKIKYPENFLLRGNHECASINRIYGFYDECKRRFNVRLWKIFTDCFNCLPVAALIDDKILCMHGGLSPDLNLD
AtTOPP2 LLLAYKIKYPENFLLRGNHECASINRIYGFYDECKRRFSVRLWVFTDCFNCLPVAALIDDKILCMHGGLSPDLNVE
AtTOPP5 LLLAYKIKYPENFLLRGNHECASINRIYGFYDECKRRFNVKLWVFTDFTNCLPVAALIDDKILCMHGGLSPELINV
AtTOPP4 LLLAYKIKYPENFLLRGNHECASINRIYGFYDECKRRFNVRWVFTDCFNCLPVAALIDDKILCMHGGLSPDLHLD
AtTOPP6 LLLAYKIKYPENFLLRGNHECASINRIYGFYDECKRRFNVRLWKTFTDCFNCLPVAALIDDKILCMHGGLSPDLKSL
AtTOPP7 LLLAYKIKYPENFLLRGNHECASINRIYGFYDECKRRFSVKLWIFTDCFNCLPVAALIDDKILCMHGGLSPDLKSL
AtTOPP8 LLLAYKIKYPENFLLRGNHECASINRIYGFYDECKRRFNVRLWVFTDCFNCLPVAALIDDKILCMHGGLSPDLNLD
AtTOPP9 LLLAYKIKYPENFLLRGNHECASINRIYGFYDECKRRFNVRLWKIFTDCFNCLPVAALIDDKILCMHGGLSPELENG
AtTOPP1 LLLAYKIKYPENFLLRGNHECASINRIYGFYDECKRRFNVRLWKIFTDCFNCLPVAALIDDKILCMHGGLSPELKS
AtTOPP3 LLLAYKIKYPENFLLRGNHECASINRIYGFYDECKRRFSVRLWVFTDCFNCLPVAALIDDKILCMHGGLSPELHLD
StPP1c-1 LLLAYKIKYPENFLLRGNHECASINRIYGFYDECKRRFNVRLWVFTDCFNCLPVAALIDDKILCMHGGLSPDLTDM
StPP1c-2 LLLAYKIKYPENFLLRGNHECASINRIYGFYDECKRRFNVKLWKSFTDCFNCLPVAALIDDKILCMHGGLSPDLSS
StPP1c-3 LLLAYKIKYPENFLLRGNHECASINRIYGFYDECKRRFNVRLWKIFTDCFNCLPVAALIDDKILCMHGGLSPDLNLD
NbPP1c-4 LLLAYKIKYPENFLLRGNHECASINRIYGFYDECKRRFNVRLWKIFTDCFNCLPVAALIDDKILCMHGGLSPELKS
StPP1c-4 LLLAYKIKYPENFLLRGNHECASINRIYGFYDECKRRFNVRLWKIFTDCFNCLPVAALIDDKILCMHGGLSPELKS
AtPP2a At1g69960 LLVALKVRVYRDLRTLLRGNHESRQITQVYGFYDECKRRKYNANVWKHFTDLELYLPLTALIESQVFCILHGGLSPDLTDL
```

```
170 180 190 200 210 220 230 240
NbPP1c-1 EIRNLRPTDIPDGLLDCDLSWSPSRVKGWGMNDRGVSYTFGDKVAEFLMQHMDLVCRAHQVVEDGYEFFAERQLV
NbPP1c-2 EIRNLRPTAIPDGLLDCDLSWSPSRVKGWGMNDRGVSYTFGDKVSEFLSKHLDLVCRAHQVVEDGYEFFAERQLV
NbPP1c-3 QIRNLRPTDIPDGLLDCDLSWSPSRVKGWGMNDRGVSYTFGDKVTEFLKQDLDLVCRAHQVVEDGYEFFANRQLV
AtTOPP2 QIKNIRPTDIPDGLLDCDLSWSPSRVKGWGMNDRGVSYTFGDKVAEFLKNDMDLVCRAHQVVEDGYEFFADRQLV
AtTOPP5 QIKNIRPTDIPDGLLDCDLSWSPSRVKGWGMNDRGVSYTFGDKVAEFLKNDMDLVCRAHQVVEDGYEFFADRQLV
AtTOPP4 EIRNLRPTDIPDGLLDCDLSWSPSRVKGWGMNDRGVSYTFGDKVSEFLKHDLDLVCRAHQVVEDGYEFFADRQLV
AtTOPP6 DIRRIRPTDIPDGLLDCDLSWSPSRVKGWGMNDRGVSYTFGDKVAEFLQTHLDLVCRAHQVVEDGYEFFAKRQLV
AtTOPP7 QIRNLRPTDIPDGLLDCDLSWSPSRVKGWGMNDRGVSYTFGDKVSEFLKRLDLDLVCRAHQVVEDGYEFFANKRQLV
AtTOPP8 QIREIQRPTDIPDGLLDCDLSWSPSRVKGWGMNDRGVSYTFGDKVAEFLKNDLDLVCRAHQVVEDGYEFFAKRRLV
AtTOPP9 QIREIQRPTDIPDGLLDCDLSWSPSRVKGWGMNDRGVSYTFGDKVAEFLKNDLDLVCRAHQVVEDGYEFFAKRRLV
AtTOPP1 QIRNLRPTDIPDGLLDCDLSWSPSRVKGWGMNDRGVSYTFGDKVAEFLKNDMDLVCRAHQVVEDGYEFFAERQLV
AtTOPP3 EIRNLRPTDIPDGLLDCDLSWSPSRVKGWGMNDRGVSYTFGDKVSEFLQTHLDLVCRAHQVVEDGYEFFANRQLV
StPP1c-1 LIRNLRPTDIPDGLLDCDLSWSPSRVKGWGMNDRGVSYTFGDKVAEFLMQHMDLVCRAHQVVEDGYEFFAERQLV
StPP1c-2 QIRNLRPTAIPDGLLDCDLSWSPSRVKGWGMNDRGVSYTFGDKVSEFLSKHLDLVCRAHQVVEDGYEFFAERQLV
StPP1c-3 QIRNLRPTDIPDGLLDCDLSWSPSRVKGWGMNDRGVSYTFGDKVTEFLKHELDLVCRAHQVVEDGYEFFANRQLV
NbPP1c-4 QINEIQRPAEIPDGLLDCDLSWSPSRVKGWGMNDRGVSYTFGDKVAEFLKNDLDLVCRAHQVVEDGYEFFAKRRLV
StPP1c-4 LIRNLRPTAIPDGLLDCDLSWSPSRVKGWGMNDRGVSYTFGDKVAEFLKNDLDLVCRAHQVVEDGYEFFAKRRLV
AtPP2a At1g69960 NLRSLDRITQEVPHGPMCDLWSPSRVKGWGMNDRGVSYTFGDKVSEFLKNDMDLVCRAHQVVEDGYEFFANRQLV
```

```
250 260 270
NbPP1c-1 TIFSAAPNYCGEFDNAGAMMSVDENLMCSFQILK
NbPP1c-2 TIFSAAPNYCGEFDNAGAMMSVDENLLCSFQILK
NbPP1c-3 TIFSAAPNYCGEFDNAGAMMSVDENLMCSFQILK
AtTOPP2 TIFSAAPNYCGEFDNAGAMMSVDESLLMCSFQILK
AtTOPP5 TIFSAAPNYCGEFDNAGALMSVDESLLMCSFQILK
AtTOPP4 TVFSAAPNYCGEFDNAGAMMSVDENLMCSFQILK
AtTOPP6 TIFSAAPNYCGEFDNAGALMSVDESLLMCSFQILK
AtTOPP7 TIFSAAPNYCGEFDNAGAMMSVDESLLMCSFQILK
AtTOPP8 TIFSAAPNYGGEFDNAGALLSVDESLLMCSFQILK
AtTOPP9 TIFSAAPNYGGEFDNAGALLSVDESLLMCSFQILK
AtTOPP1 TVFSAAPNYCGEFDNAGAMMSVDESLLMCSFQILK
AtTOPP3 TIFSAAPNYCGEFDNAGAMMSVDESLLMCSFQILK
StPP1c-1 TVFSAAPNYCGEFDNAGAMMSVDENLMCSFQILK
StPP1c-2 TIFSAAPNYCGEFDNAGAMMSVDENLMCSFQILK
StPP1c-3 TVFSAAPNYCGEFDNAGAMMSVDENLMCSFQILK
NbPP1c-4 TIFSAAPNYGGEFDNAGALLSVDEQLVCSFEILK
StPP1c-4 TIFSAAPNYGGEFDNAGALLSVDEQLVCSFEILK
AtPP2a At1g69960 TVFSAAPNYCYRCGNMAIILEIGENMDQNLQFD
```



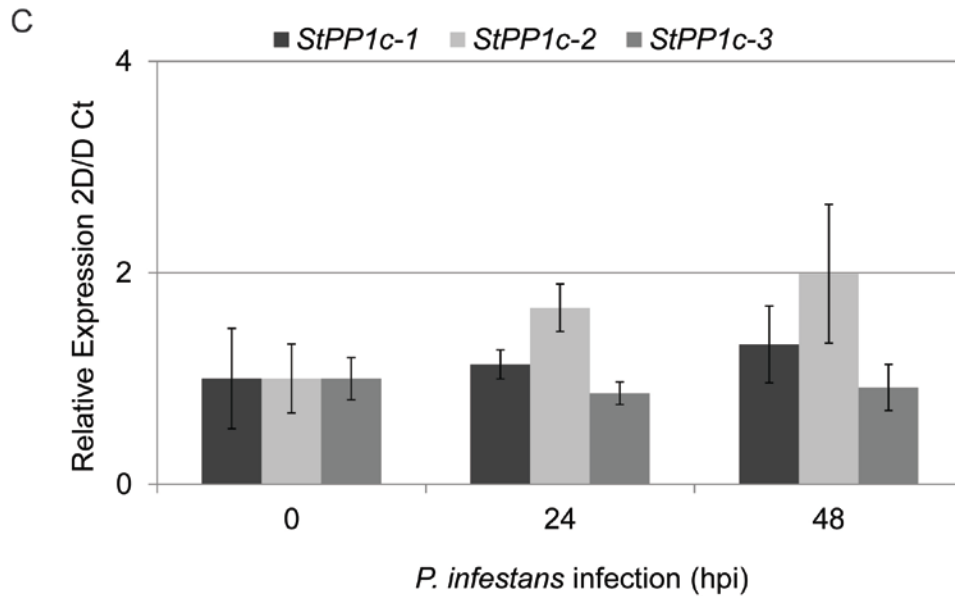

**Supplementary Figure 3. Phylogenetic tree and alignment of Arabidopsis, *N. benthamiana* and *S. tuberosum* PP1c sequences**

(A) Phylogenetic tree of PP1c sequences from Arabidopsis, *N. benthamiana* and *S. tuberosum* rooted with an Arabidopsis PP2a sequence shows the potato PP1c isoforms targeted by effector Pi04314 cluster separately from the non-interacting PP1c-4. Potato PP1c-1 and PP1c-2 cluster with the Arabidopsis TOPP4. A maximum likelihood tree was produced for the alignment using TOPALi v2.5 with 1000 bootstraps. The resulting tree was rendered with TreeView. The sequences in red are the interacting clones identified in the Y2H screen.

(B) The amino acid alignment used to generate the tree was performed by CLUSTALW and trimmed to remove poorly conserved regions. The residue highlighted in red is the amino acid mutated in *StPP1c-1* to make the His129Ala mutant PP1c-1mut.

(C) QRT-PCR analysis of *StPP1c-1*, *StPP1c-2* and *StPP1c-3* at 24 and 48 hours post-inoculation of *P. infestans* on potato cv Desiree, relative to expression in uninfected potato leaves (0), which was given a value of 1.

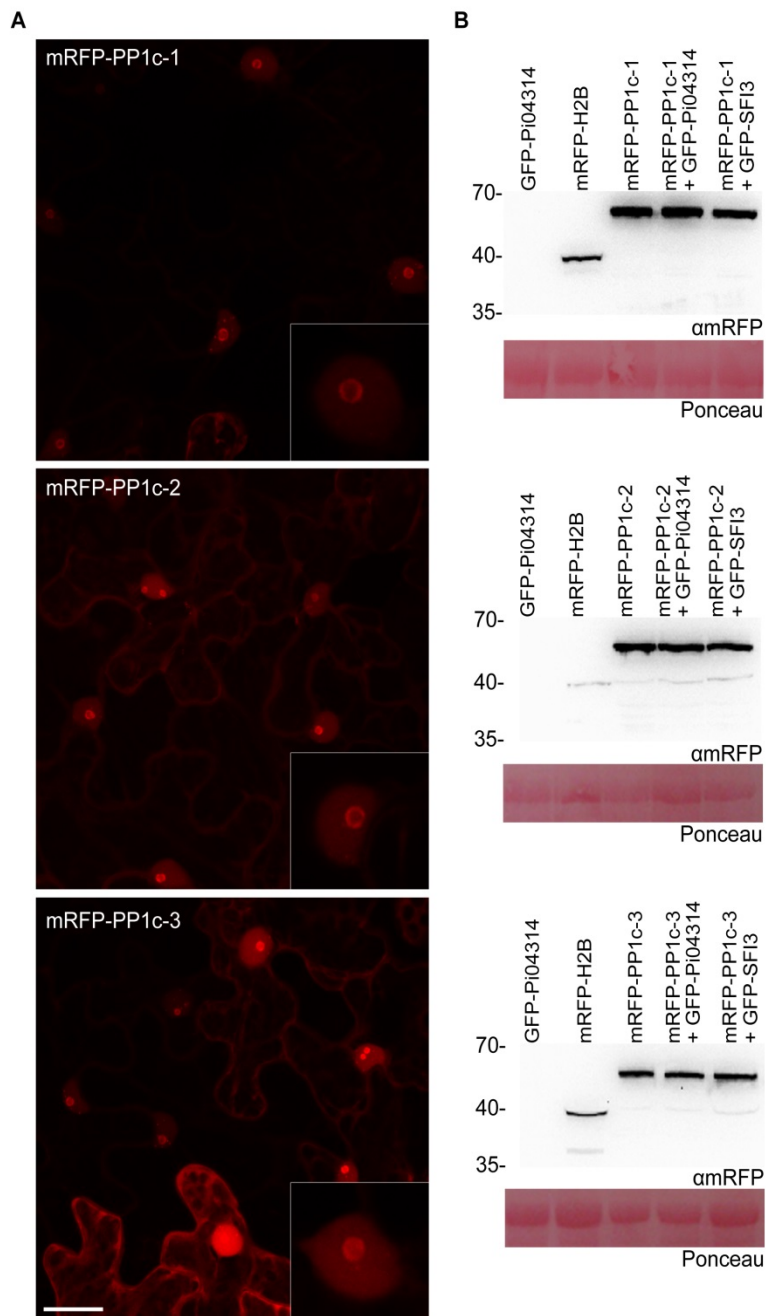

**Supplementary Figure 4. mRFP-PP1c fusions are localised to the nucleus and nucleolus and are equally stable alone or in the presence of Pi04314 and SF13.**

(A) Images are projections of confocal z series of each of the interacting PP1c isoform expressed alone as mRFP fusions which accumulate in the nucleolus. Insets are single optical sections through one of the nuclei from each image. Scale bar is 20  $\mu$ m.

(B) Western blots probed with mRFP antibody ( $\alpha$ mRFP) show that the mRFP-PP1c fusions are stable alone and when co-expressed with GFP-Pi04314 and GFP-SF13. Size markers are in kDa. Protein loading is indicated by the Ponceau stain.

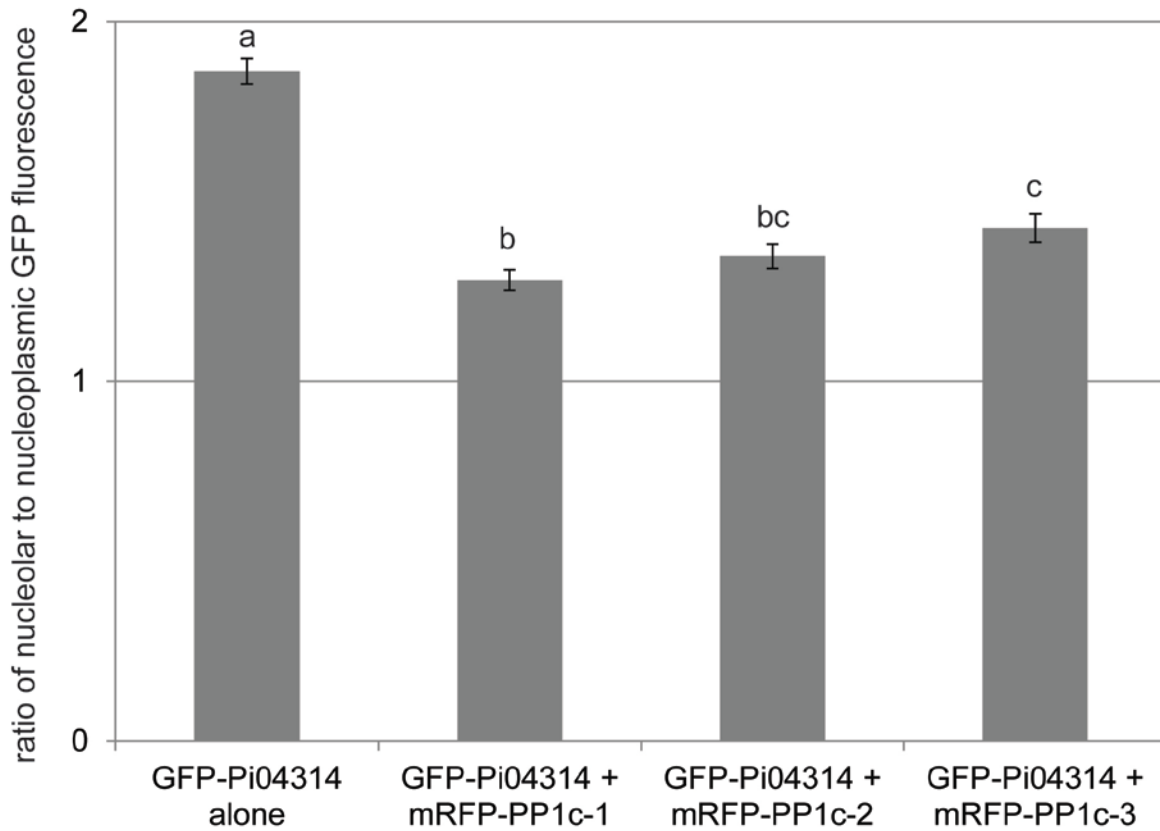

**Supplementary Figure 5. GFP-Pi04314 is also relocalised out of the nucleolus on co-expression with PP1c fusions.**

Graph showing that the GFP-Pi04314 accumulation in the nucleolus is reduced when co-expressed with mRFP-PP1c isoform fusions. Error bars are standard error and the graph represents the combined data from 3 biological replicates (n = 35 per construct), letters on graph denote statistically significant differences (ANOVA  $p > 0.001$  [except b to c where  $p = 0.045$ ]).

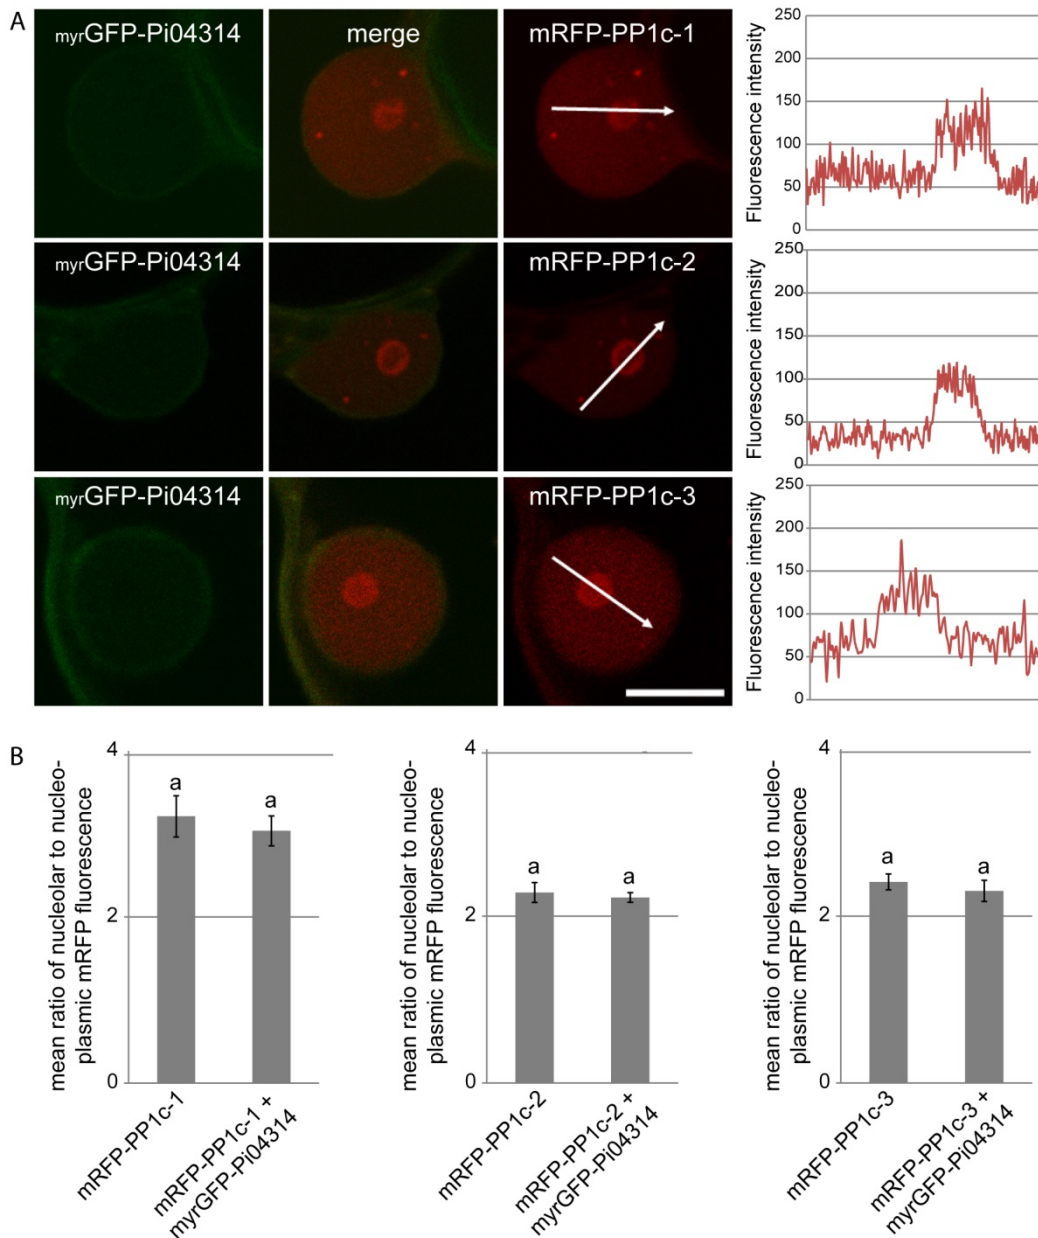

**Supplementary Figure 6. *myrGFP-Pi04314* does not cause a loss of mRFP-PP1c from the nucleolus.**

(A) Images are single optical sections through example nuclei co-expressing *myrGFP-Pi04314* and the mRFP-PP1c isoforms, showing that the mRFP-PP1c isoforms are not relocalised by *myrGFP-Pi04314*. Scale bar is 10  $\mu$ m. White arrows indicate mRFP fluorescence intensity plots shown in graphs to the right of each image.

(B) Graphs of the average ratios of nucleolar to nucleoplasmic mRFP fluorescence from the mRFP-PP1c fusions expressed alone or with *myrGFP-Pi04314* showing there was no significant reduction in co-expressing cells. Error bars are standard error and the graph represents the combined data from 3 biological reps (n = 40 per construct), letters on graph denote statistically insignificant differences (ANOVA  $p > 0.95$ ).



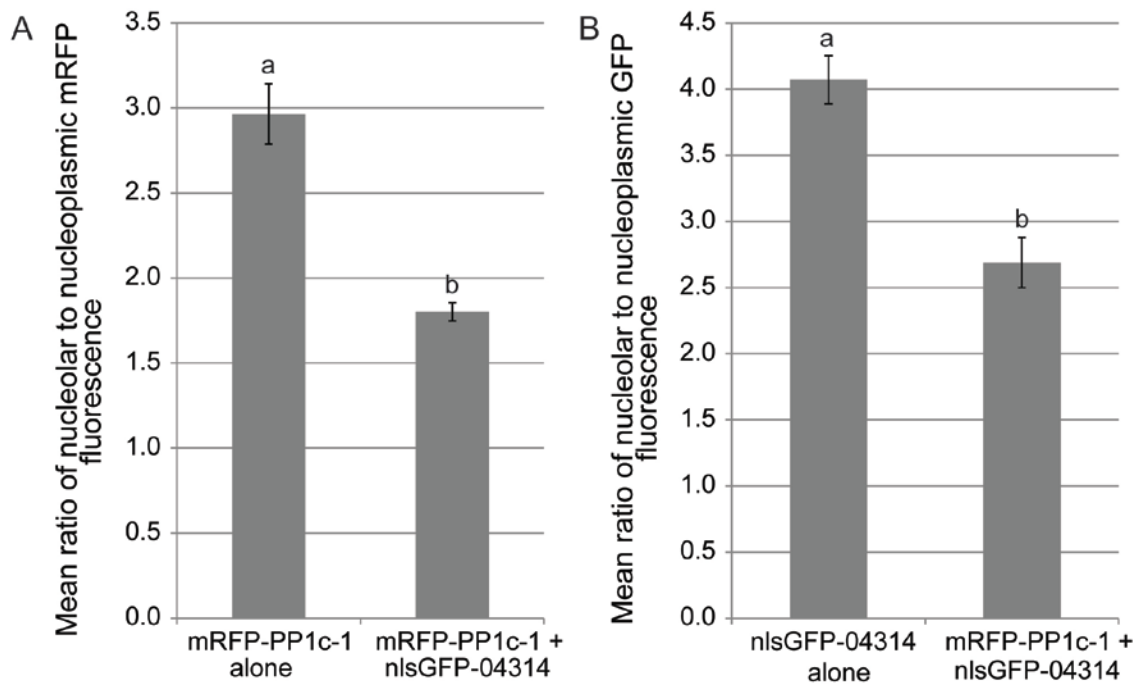

**Supplementary Figure 7. Co-expression of  $\text{NLSGFP-Pi04314}$  with mRFP-PP1c-1 results in reduced GFP and mRFP fluorescence in the nucleolus.**

(A) Graph of the average ratio of nucleolar to nucleoplasmic mRFP fluorescence from the mRFP-PP1c-1 fusion expressed alone or with  $\text{NLSGFP-Pi04314}$  showing there was a significant reduction in co-expressing cells. Error bars are standard error and the graph represents the combined data from 3 biological reps ( $n = 40$  per construct), letters on graph denote statistically significant differences (ANOVA  $p < 0.001$ ).

(B) Graph of the average ratio of nucleolar to nucleoplasmic GFP fluorescence from the  $\text{NLSGFP-Pi04314}$  fusion expressed alone or with mRFP-PP1c-1 showing there was a significant reduction in co-expressing cells. Error bars are standard error and the graph represents the combined data from 3 biological reps ( $n = 40$  per construct), letters on graph denote statistically significant differences (ANOVA  $p < 0.001$ ).

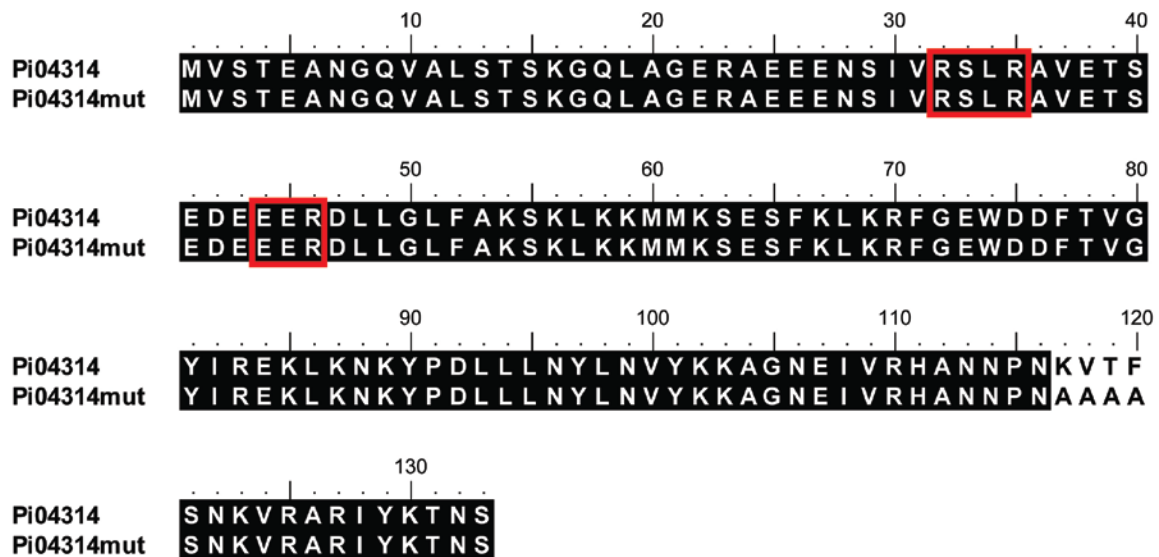

**Supplementary Figure 8. Alignment of the protein sequences of the wild type and mutant forms of the effector Pi04314. (Related to Fig. 4).**

The wild type and mutant Pi04314 amino acid sequences aligned. The conserved RXLR and EER motifs are boxed in red and the location of the R/KVxF PP1c binding motif (KVTF) and its mutation to alanines in Pi04314mut are shown with a white background.

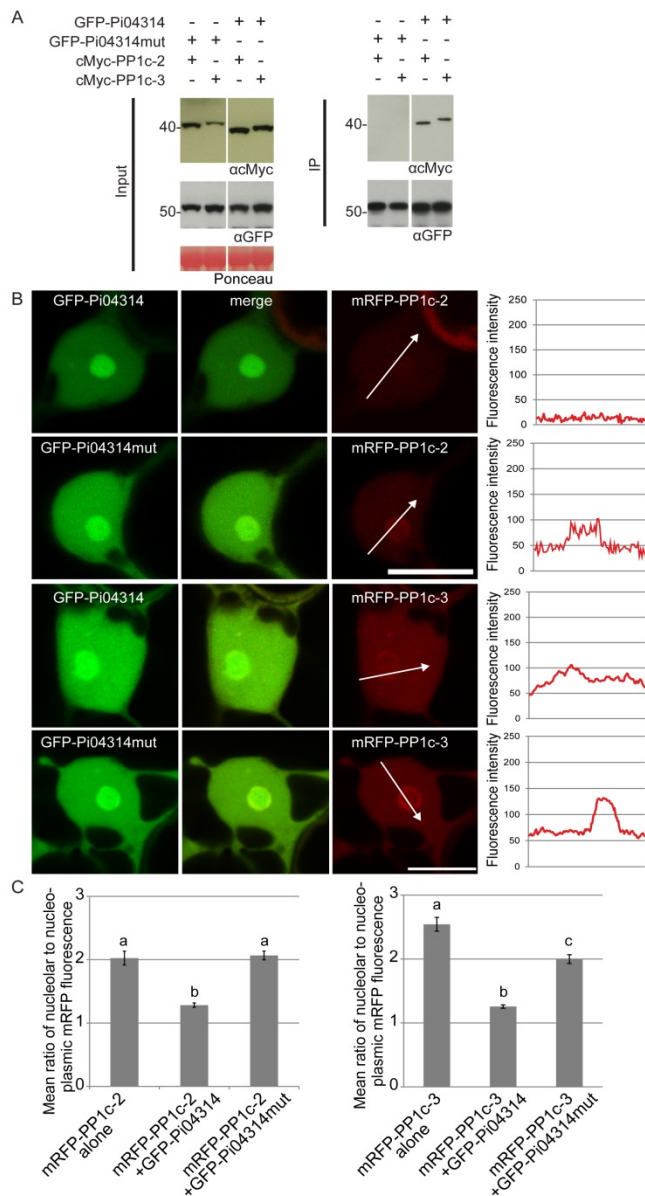

**Supplementary Figure 9. The Pi04314 KVxF mutant does not interact with PP1c proteins.**

(A) Immunoprecipitation of protein extracts from agroinfiltrated leaves using GFP-trap shows that PP1c-2 and -3 also lose their association with Pi04314mut. Expression of constructs in the leaves is indicated by +. Protein size markers are indicated in kDa, and protein loading is indicated by Ponceau stain.

(B) Representative single optical section images comparing the co-expression of the mRFP-PP1c isoforms 2 and 3 with GFP-Pi04314 (reduced nucleolar fluorescence) or GFP-Pi04314mut (normal nucleolar fluorescence). Scale bar is 10  $\mu$ m. White arrows indicate fluorescence intensity plots in graphs to the right of each image.

(C) Graphs of the ratios of nucleolar to nucleoplasmic ratios indicate that GFP-Pi04314mut does not cause as much of a reduction in nucleolar labelling by the mRFP-PP1c isoforms 2 and 3 as the wild type GFP-Pi04314. Error bars are standard error and the graph represents the combined data from 3 biological reps ( $n = 40$  per construct), letters on graph denote statistically significant differences (ANOVA  $p > 0.001$ ).

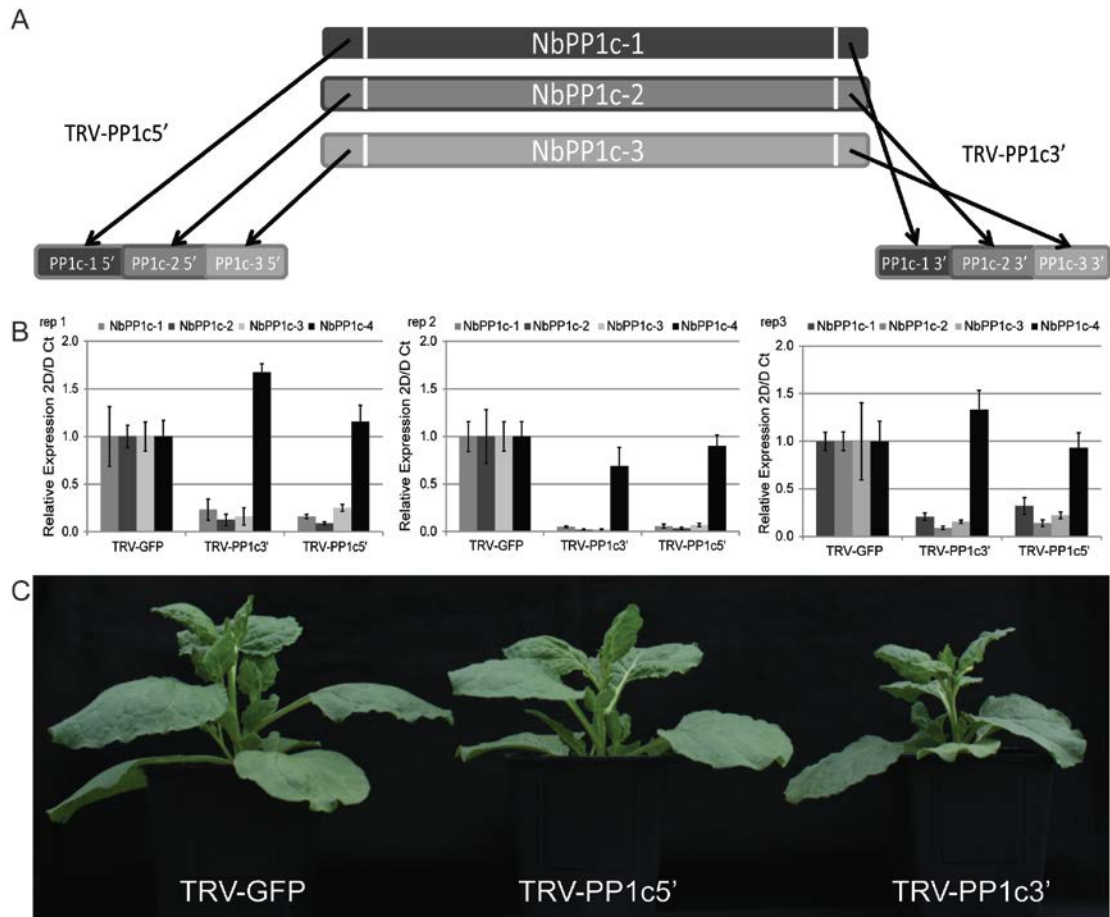

**Supplementary Fig. 10. Silencing vector construction, silencing levels and plant phenotypes.**

(A) Diagrammatic representation of the sequences of the targeted PP1c isoforms and the variable sequence regions at either end selected for inclusion in the silencing constructs.

(B) Analysis of the extent of silencing of the three targeted PP1c isoforms compared to the off-target silencing control PP1c-4 using qRT-PCR. The targeted genes exhibit 80-95% reduction in expression in TRV-PP1c5' & 3' plants compared to TRV-GFP whereas the off-target silencing control expression is comparable in each plant line.

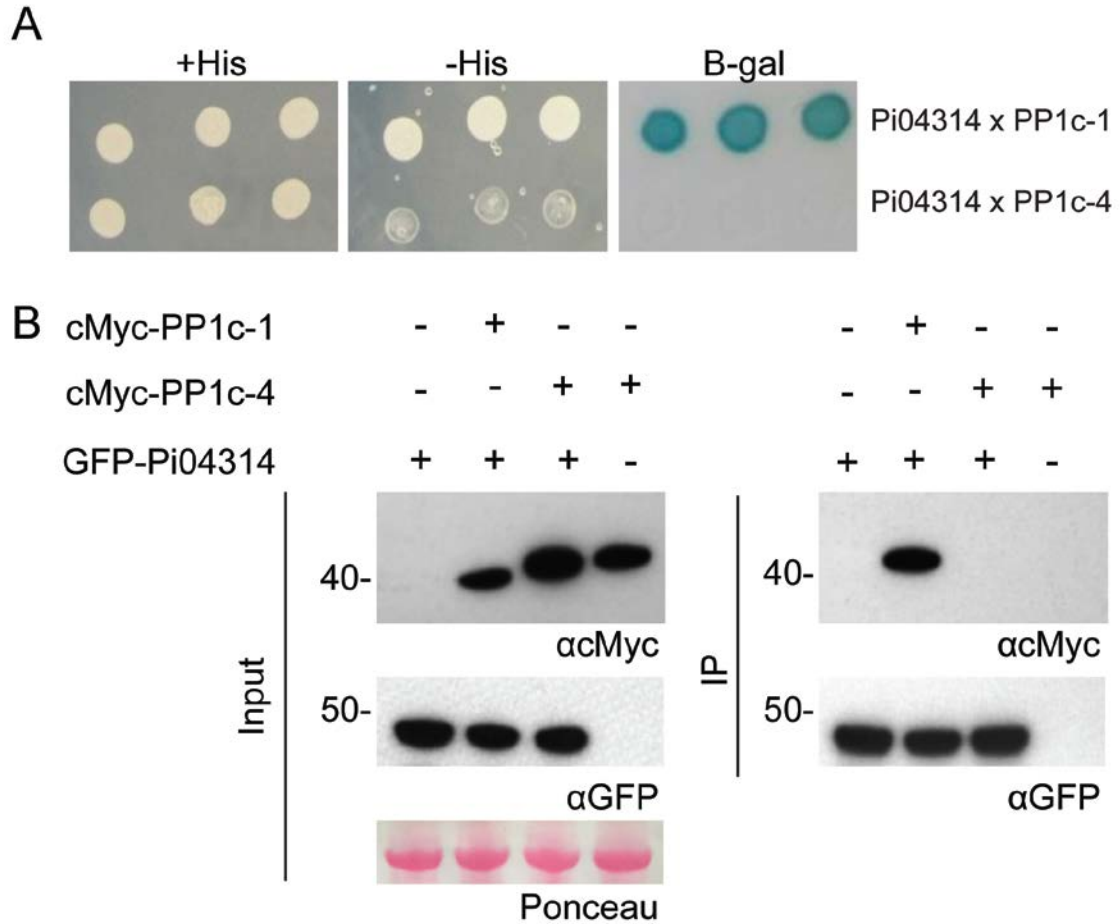

**Supplementary Figure 11. The off-target silencing control PP1c-4 does not interact with Pi04314.**

(A) Yeast co-expressing the PP1c-1 with Pi04314 grew on non-selective medium (+HIS) and selective medium (-HIS) and had  $\beta$ -galactosidase (B-Gal) activity while those co-expressing PP1c-4 did not.

(B) The lack of interaction between PP1c-4 and the effector was confirmed by immunoprecipitation using GFP trap, cMyc-PP1c-1 was immunoprecipitated with GFP-Pi04314 whereas cMyc-PP1c-4 was not. Expression of constructs in the leaves is indicated by +. Protein size markers are indicated in kDa, and protein loading is indicated by Ponceau stain.



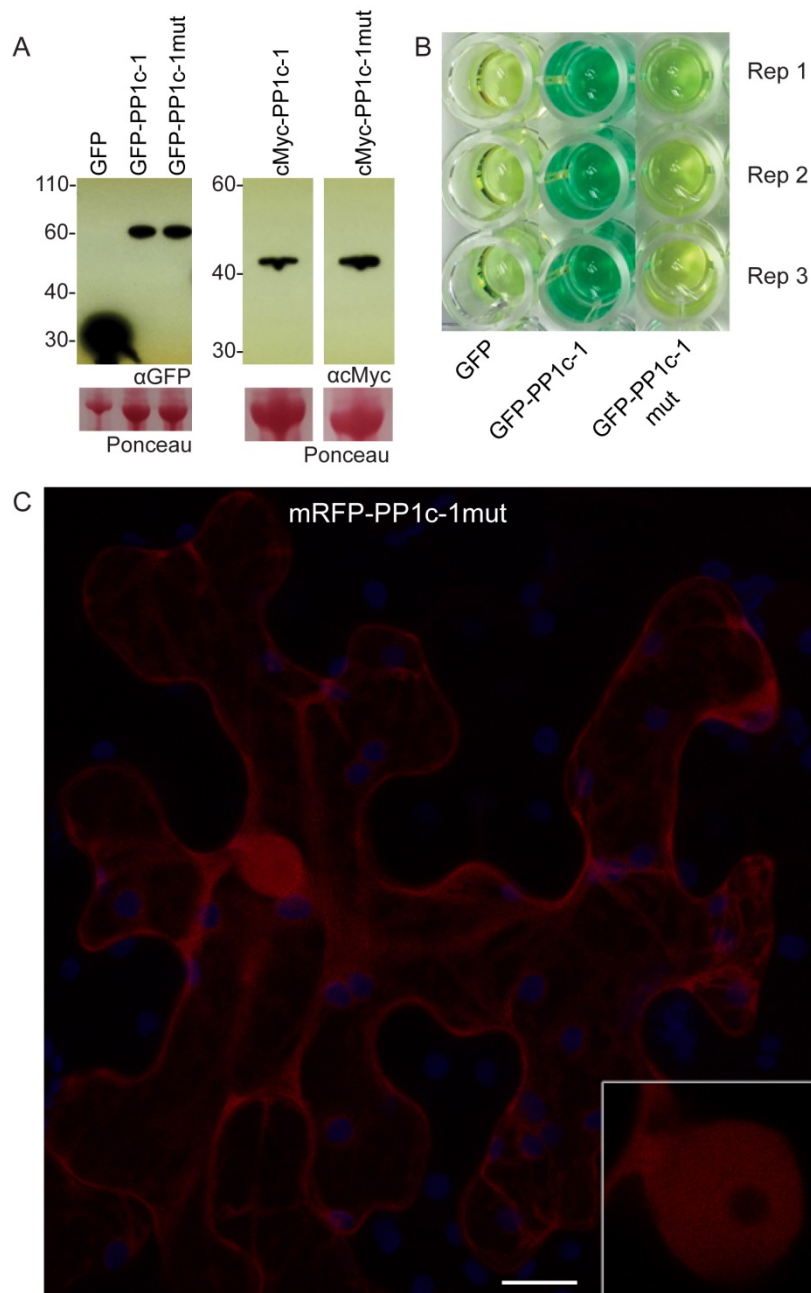

**Supplementary Figure 12. PP1c-1mutant constructs are stable and do not possess phosphatase activity.**

(A) Immunoblots showing the stability of GFP-PP1c-1 and GFP-PP1c-1mut used for the phosphatase activity assays. cMyc-PP1c and cMyc-PP1c-1mut used in the *in planta* virulence assays and co-immunoprecipitation are also stable. Protein size markers are indicated in kDa, and protein loading is indicated by Ponceau stain. Antibody probes are indicated ( $\alpha$ Myc and  $\alpha$ GFP).

(B) Pictures show the visual readout of the phosphatase assay for the GFP empty vector (weak yellow colour), GFP-PP1c-1 (strong green colour) and GFP-PP1c-1mut (weak yellow colour).

(C) Image is a projection of a confocal z series of each of mRFP-PP1c-1mut isoform expressed alone which is evident in the cytoplasm and nucleoplasm, but absent from the nucleolus. Inset is a single optical section through one of the nuclei. Scale bar is 10  $\mu$ m.

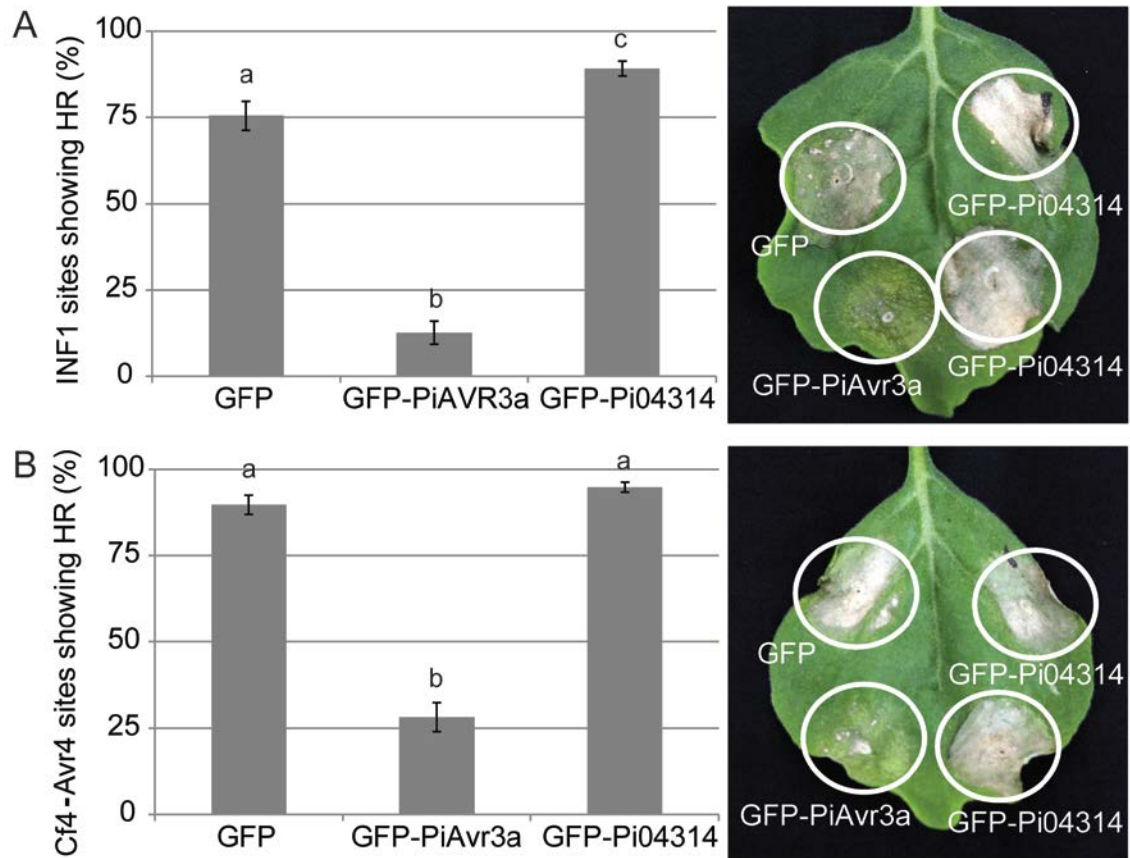

**Supplementary Figure 13. Pi04314 fails to suppress INF1- or Cf4/Avr4-mediated cell death.**

(A) The *P. infestans* PAMP INF1 elicited similar levels of cell death when co-expressed with either free GFP or with GFP-Pi04314, whereas cell death was significantly attenuated following co-expression with the positive control AVR3a.

(B) Co-expression of tomato Cf4 resistance with *Cladosporium fulvum* AVR4 led to a similar percentage of infiltration sites yielding cell death when co-expressed with GFP or GFP-Pi04314, compared to the positive control AVR3a. Circles indicate infiltration zones on leaves. Each graph is calculated from 3 biological replicates, each involving 18 infiltrations for each co-expression. Letters denote significant difference (ANOVA  $p < 0.01$ ) compared to the GFP control (given letter 'a').

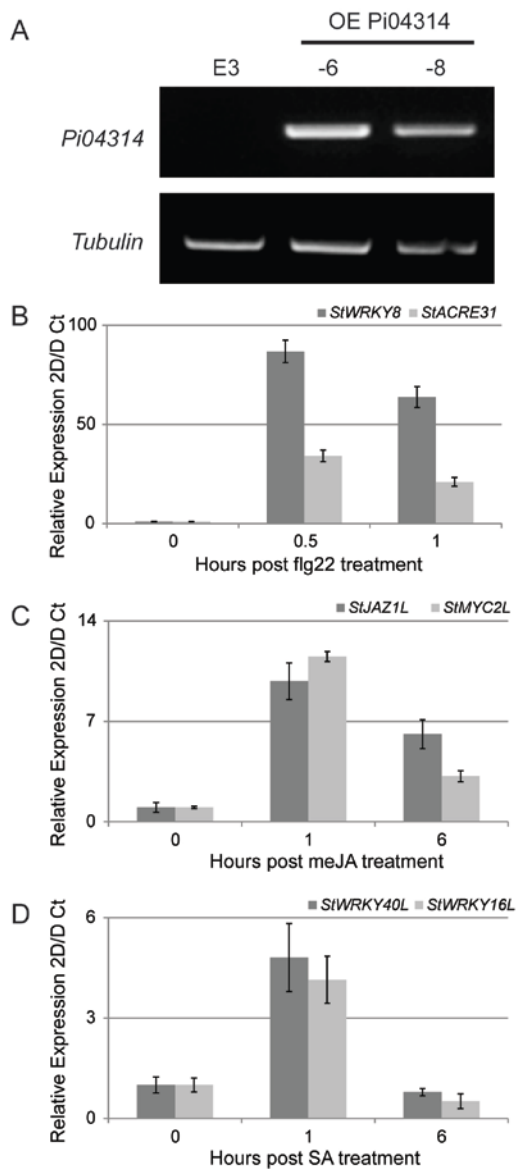

**Supplementary Figure 14. Early flg22-, meJA- and SA-responsive genes for analyses of Pi04314-expressing transgenic potato lines OE-6 and OE8.**

(A) RT-PCR analysis showing that *Pi04314* transcript can be detected in Pi04314-expressing potato lines OE-6 and OE-8, no such expression can be detected in the untransformed potato cv E3, whereas tubulin is detected in all cases.

(B) Relative expression (compared to untreated leaves, which were given a value of 1), using real time qRT-PCR, of *StWRKY8* and *StACRE31* in potato cv E3 after treatment with flg22.

(C) Relative expression (compared to untreated leaves, which were given a value of 1), using real time qRT-PCR, of *StJAZ1L* and *StMYC2L* in potato cv E3 after treatment with meJA.

(D) Relative expression (compared to untreated leaves, which were given a value of 1), using real time qRT-PCR, of *StWRKY40L* and *StWRKY16L* in potato cv E3 after treatment with SA. Error bars in B-D represent standard error.

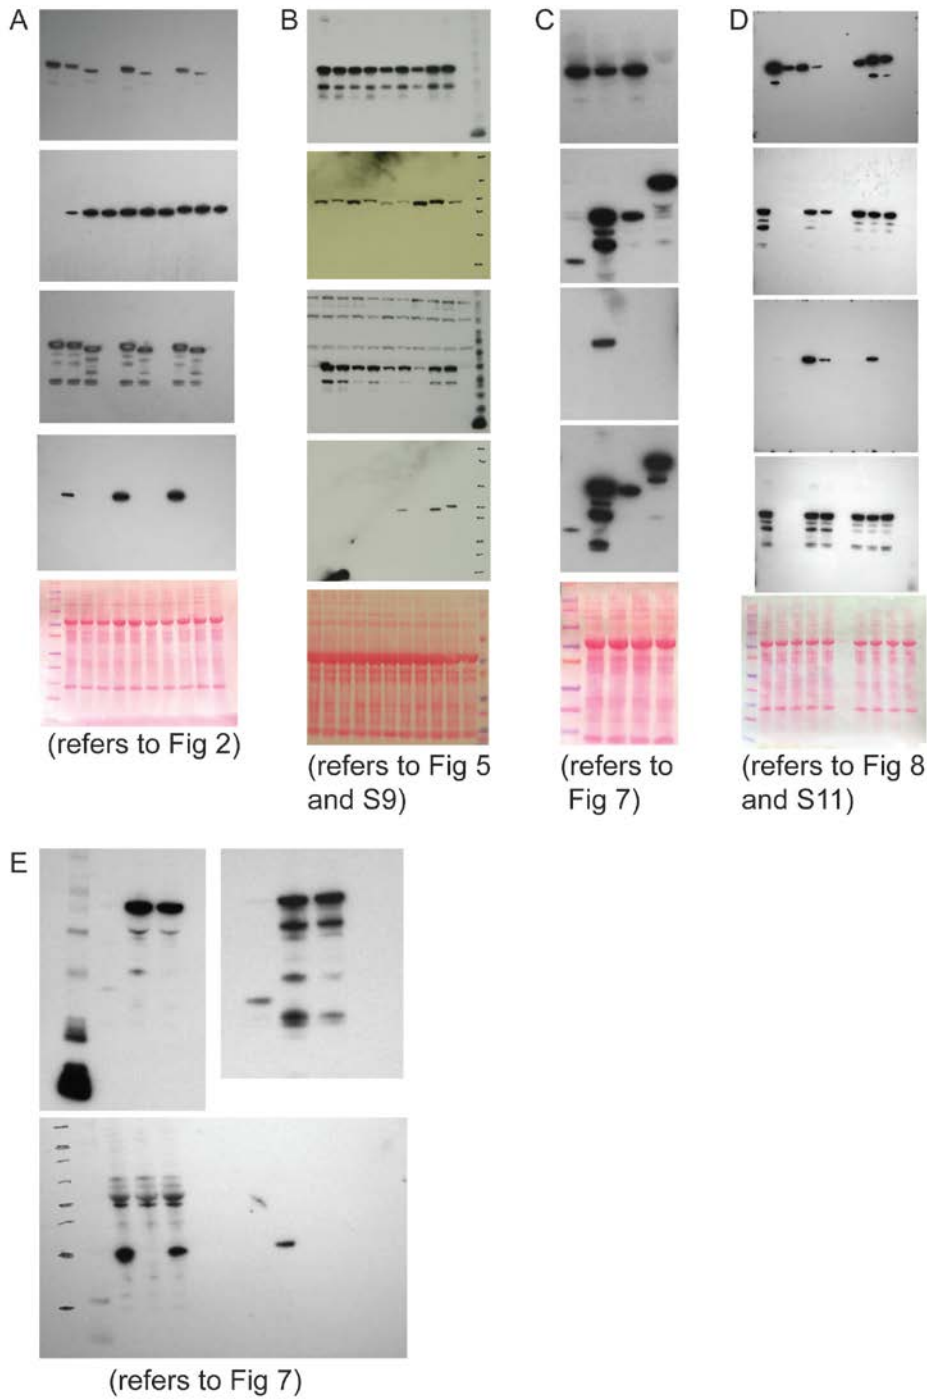

**Supplementary Figure 15. Original full length images for immunoblots (where those were not already used in Figures).** The Figure associated with each immunoblot image is indicated below the image.

**Supplementary Table 1:** Primers used in this study

| Primer                                                       | Use                        |
|--------------------------------------------------------------|----------------------------|
| StPP1c-1_GW_F: AAAGCAGGCTTCACCATGGCTCAAATGGGCAGGGG           | Gateway cloning primers    |
| StPP1c-1_GW_R: GAAAGCTGGGTCTCACAAGAACCGAGGTTTC               | Gateway cloning primers    |
| StPP1c-2_GW_F: AAAGCAGGCTTCACCATGGACCCTGCAGCTGTCGATAG        | Gateway cloning primers    |
| StPP1c-2_GW_R: GAAAGCTGGGTCTCACATCATAAACTTATT                | Gateway cloning primers    |
| StPP1c-3_GW_F: AAAGCAGGCTTCACCATGGACCAGAATGTGTTGGATG         | Gateway cloning primers    |
| StPP1c-3_GW_R: GAAAGCTGGGTCTCATGCTTTGGAATAAA                 | Gateway cloning primers    |
| StPP1c-4_GW_F: AAAGCAGGCTTCACCATGGAGGGATTGATGGAAAAGG         | Gateway cloning primers    |
| StPP1c-4_GW_R: GAAAGCTGGGTCTCACATCCCTCCAGCCTTGG              | Gateway cloning primers    |
| Pi04314_GW_F: AAAGCAGGCTTCACCATGGTATCGACCGAAGCTAATGGG        | Gateway cloning primers    |
| Pi04314_GW_R: GAAAGCTGGGTCTACGAGTTGGTTTTGTAGATACGAGC         | Gateway cloning primers    |
| SFI3_GW_F: AAAGCAGGCTTCACCATGGCGTCTGCTGAGACGTCA              | Gateway cloning primers    |
| SFI3_GW_R: GAAAGCTGGGTCTCAAGGTGTGGCCAGCCTC                   | Gateway cloning primers    |
| NLSforwardSpe:<br>CTAGTATGTGTACACCACCTAAGAAAAAGAAACGTAAAGTGA | NLS signal oligonucleotide |
| NLSreverseSpe: CTAGTACTTTACGTTTCTTTTTCTTAGGTGGTGTACACATA     | NLS signal oligonucleotide |
| PITG04314F: TCCATATGATGGTATCGACCGAAGCTAATGG                  | GM Potato cloning          |
| PITG04314R: CGGGATCCCTACGAGTTGGTTTTGTAGATACG                 | GM Potato cloning          |
| qRTNbPP1c-1F: CAATGTGAGGCTGTGGAAGA                           | qRT-PCR primers            |
| qRTNbPP1c-1R: ATCGCAAAGCAAACCAGAGT                           | qRT-PCR primers            |
| qRTNbPP1c-2F: CCTGTGGCAGCACTTATTGA                           | qRT-PCR primers            |
| qRTNbPP1c-2R: TCGGGTATGGCAGTTGGA                             | qRT-PCR primers            |
| qRTNbPP1c-3F: CCAGTGGCTGCCTTAATAGATG                         | qRT-PCR primers            |
| qRTNbPP1c-3R: CCAAAGCAAATCACAGAGCAA                          | qRT-PCR primers            |
| qRT_NbPP1c-4F: AAAGATTCGGATCAAATAAATGAAAT                    | qRT-PCR primers            |
| qRT_NbPP1c-4R: AGGATCAGACCATAACAGATCACA                      | qRT-PCR primers            |
| qRT_Nb-ef1aF:TGGACACAGGGACTTCATCA                            | qRT-PCR primers            |
| qRT_Nb-ef1aR:CAAGGGTGAAAGCAAGCAAT                            | qRT-PCR primers            |
| qRT_04314F: GGTTGCCCTATCTACGAGCAAA                           | qRT-PCR primers            |
| qRT_04314R: GGGACCTGACGATGCTGTTTT                            | qRT-PCR primers            |
| ACTAF2: CATCAAGGAGAAGCTGACGTACA                              | qRT-PCR primers            |
| ACTAR2: GACGACTCGGCGGCAG                                     | qRT-PCR primers            |
| qRT_StPP1c-1F: CAATGTGAGGCTGTGGAAAG                          | qRT-PCR primers            |
| qRT_StPP1c-1R: ACGGGAAGACAGTTGAAACAA                         | qRT-PCR primers            |
| qRT_StPP1c-2F: TCTTCCTGTAGCAGCACTTATCG                       | qRT-PCR primers            |
| qRT_StPP1c-2R: TCTGGGATGGCAGTTGGA                            | qRT-PCR primers            |
| qRT_StPP1c-3F: CGGTCGCTGCCTTAATAGATG                         | qRT-PCR primers            |
| qRT_StPP1c-3R: CCAAAGCAAATCACAGAGCAA                         | qRT-PCR primers            |
| qRT_StACRE31-F: CAGGATGAATCGGATCTGAAA                        | qRT-PCR primers            |
| qRT_StACRE31-R: CGGCAATCCCAATTTCTCTA                         | qRT-PCR primers            |
| qRT_StWRKY8F: CCTACTGTGACATCTCATCAATCC                       | qRT-PCR primers            |
| qRT_StWRKY8R: GGGTGCTCCCATTTTCAGAC                           | qRT-PCR primers            |
| qRT_StJAZ1LF: CTCAACAAACAGCTACCACCAC                         | qRT-PCR primers            |
| qRT_StJAZ1LR: CGATGAATCACTTGATTTCTCAAT                       | qRT-PCR primers            |



|                                            |                 |
|--------------------------------------------|-----------------|
| qRT_StMYC2LF: AGCGTATGGAATGGAAGTGG         | qRT-PCR primers |
| qRT_StMYC2LR: CGCAACACGTTCAATCAATCT        | qRT-PCR primers |
| qRT_StWRKY40LF: AAAATATGGTCAAAAAGTGACAAGAG | qRT-PCR primers |
| qRT_StWRKY40LR: CATGTTGGTGCAAATGAACAC      | qRT-PCR primers |
| qRT_StWRKY16L_F: CAAGTGGAGGATGCAATGTG      | qRT-PCR primers |
| qRT_StWRKY16L_R: GTTGGGAGGGAATTGTGTGT      | qRT-PCR primers |
| qRT_StUBIF: ACACCATTGATAATGTCAAGGCTAAG     | qRT-PCR primers |
| qRT_StUBIR: GCCATCCTCCAATTGCTTTC           | qRT-PCR primers |
